# Supplementary material for: Factors Explaining the Distribution of Physella acuta (Draparnaud, 1805) in Freshwaters of Morocco
Source: MDPI journal article supplement (doi:10.3390/w16060803), 2024-03-08
Supplement: s1 [file s1]

**Table S1.** Values of abundance of *Physella acuta* and physico-chemical parameters recorded at each site.

| Site | Abundance<br>(ind.m <sup>-2</sup> ) | pH   | Temperature<br>(°C) | Electrical<br>Cond. (µs.cm <sup>-1</sup> ) | O <sub>2</sub><br>(mg.L <sup>-1</sup> ) | NO <sub>3</sub><br>(mg.L <sup>-1</sup> ) | SO <sub>4</sub><br>(mg.L <sup>-1</sup> ) | PO <sub>4</sub><br>(mg.L <sup>-1</sup> ) | BDO <sub>5</sub><br>(mg.L <sup>-1</sup> ) | Flow velocity<br>(cm.S <sup>-1</sup> ) | Depth<br>(cm) | Sediment |
|------|-------------------------------------|------|---------------------|--------------------------------------------|-----------------------------------------|------------------------------------------|------------------------------------------|------------------------------------------|-------------------------------------------|----------------------------------------|---------------|----------|
| S1   | 25                                  | 7.05 | 26.3                | 725                                        | 5.8                                     | 4.34                                     | 189                                      | 1.705                                    | 7.25                                      | 0                                      | 10            | sand     |
| S2   | 0                                   | 6    | 25.7                | 2700                                       | 1.01                                    | 102.95                                   | 279                                      | 2.79                                     | 29.55                                     | 5                                      | 40            | sand     |
| S3   | 0                                   | 6.85 | 28                  | 1970                                       | 3.15                                    | 65.19                                    | 495                                      | 2.75                                     | 19.7                                      | 16                                     | 30            | slime    |
| S4   | 8                                   | 7.42 | 27.3                | 1835                                       | 6.22                                    | 7.34                                     | 345                                      | 0.31                                     | 7.9                                       | 18                                     | 45            | mud      |
| S5   | 10                                  | 7.85 | 22.7                | 1450                                       | 6.87                                    | 9.35                                     | 379                                      | 1.095                                    | 6.93                                      | 20                                     | 50            | mud      |
| S6   | 0                                   | 7.75 | 23.5                | 1700                                       | 8.57                                    | 2.9                                      | 227                                      | 0.023                                    | 0.49                                      | 51                                     | 15            | sand     |
| S7   | 8                                   | 7.6  | 26                  | 880                                        | 5.21                                    | 10.57                                    | 58                                       | 0.105                                    | 7.95                                      | 22                                     | 35            | sand     |
| S8   | 30                                  | 8.5  | 21.5                | 589                                        | 7.4                                     | 2.95                                     | 81                                       | 0.029                                    | 2.45                                      | 24                                     | 45            | sand     |
| S9   | 30                                  | 7.8  | 23.3                | 795                                        | 7.8                                     | 3.34                                     | 173                                      | 0.105                                    | 5.24                                      | 26                                     | 35            | mud      |
| S10  | 0                                   | 7.9  | 23                  | 577                                        | 6.81                                    | 2.93                                     | 79                                       | 0.039                                    | 6.55                                      | 50                                     | 25            | mud      |
| S11  | 53                                  | 7.6  | 23.1                | 739                                        | 6.85                                    | 1.29                                     | 52                                       | 0.015                                    | 5.5                                       | 28                                     | 30            | sand     |
| S12  | 35                                  | 8.1  | 22.4                | 953                                        | 5.75                                    | 1.66                                     | 55                                       | 0.026                                    | 6.35                                      | 30                                     | 45            | sand     |
| S13  | 0                                   | 7.3  | 19.7                | 1990                                       | 7.12                                    | 3.31                                     | 67                                       | 0.011                                    | 5.05                                      | 32                                     | 25            | slime    |
| S14  | 0                                   | 7.3  | 23                  | 1863                                       | 6.7                                     | 2.78                                     | 59                                       | 0.019                                    | 4.15                                      | 34                                     | 20            | mud      |
| S15  | 0                                   | 8.3  | 24                  | 2230                                       | 2.92                                    | 51.75                                    | 339                                      | 1.985                                    | 29.25                                     | 55                                     | 20            | mud      |
| S16  | 5                                   | 6.9  | 24                  | 1870                                       | 5.15                                    | 2.79                                     | 55                                       | 0.016                                    | 7.7                                       | 36                                     | 45            | mud      |
| S17  | 45                                  | 7.2  | 20                  | 387                                        | 9.6                                     | 1.34                                     | 40                                       | 0.012                                    | 4.8                                       | 38                                     | 45            | sand     |
| S18  | 95                                  | 7.1  | 19                  | 421                                        | 7.15                                    | 1.35                                     | 51                                       | 0.015                                    | 1.93                                      | 40                                     | 40            | sand     |
| S19  | 23                                  | 7.6  | 25                  | 1254                                       | 9                                       | 9.83                                     | 90                                       | 0.4                                      | 5.7                                       | 42                                     | 40            | slime    |
| S20  | 35                                  | 8    | 20                  | 450                                        | 7.5                                     | 0.03                                     | 40                                       | 0.005                                    | 2.4                                       | 1                                      | 35            | mud      |
| S21  | 43                                  | 7.2  | 24                  | 213                                        | 8.12                                    | 4.34                                     | 35                                       | 0.021                                    | 6.2                                       | 44                                     | 50            | mud      |
| S22  | 0                                   | 6.7  | 27                  | 2100                                       | 4.15                                    | 6.57                                     | 140                                      | 1.19                                     | 7.55                                      | 5                                      | 5             | mud      |
| S23  | 48                                  | 8.2  | 23                  | 530                                        | 6.7                                     | 0.4                                      | 40                                       | 0.4                                      | 2.5                                       | 3                                      | 25            | sand     |
| S24  | 5                                   | 8.2  | 25                  | 912                                        | 9                                       | 21.4                                     | 70                                       | 0.3                                      | 9                                         | 46                                     | 35            | sand     |
| S25  | 20                                  | 7    | 24                  | 900                                        | 5.3                                     | 5.6                                      | 64                                       | 0.02                                     | 7.8                                       | 48                                     | 40            | slime    |
| S26  | 58                                  | 7.5  | 20                  | 779                                        | 7.5                                     | 3.4                                      | 62                                       | 0.022                                    | 6.14                                      | 49                                     | 45            | mud      |
| S27  | 43                                  | 6.75 | 22                  | 1011                                       | 5.01                                    | 5.95                                     | 129                                      | 1.105                                    | 5.75                                      | 15                                     | 35            | mud      |
| S28  | 0                                   | 7.4  | 24                  | 789                                        | 6                                       | 19.6                                     | 35                                       | 0.78                                     | 9.3                                       | 56                                     | 65            | mud      |
| S29  | 33                                  | 8    | 24                  | 1127                                       | 10                                      | 40                                       | 403                                      | 2.04                                     | 12.5                                      | 17                                     | 45            | sand     |
| S30  | 0                                   | 8.1  | 24                  | 534                                        | 12                                      | 2.4                                      | 53                                       | 0.2                                      | 6                                         | 58                                     | 30            | sand     |
| S31  | 0                                   | 6.5  | 26                  | 2037                                       | 1.5                                     | 16.4                                     | 185                                      | 4.31                                     | 15.3                                      | 19                                     | 25            | slime    |

|     |     |      |      |      |      |       |     |       |       |    |    |       |
|-----|-----|------|------|------|------|-------|-----|-------|-------|----|----|-------|
| S32 | 0   | 6.5  | 25   | 1990 | 3.15 | 30.55 | 130 | 2.75  | 20.4  | 21 | 20 | mud   |
| S33 | 3   | 8.2  | 24   | 1097 | 7    | 31    | 70  | 1.3   | 17.5  | 23 | 40 | mud   |
| S34 | 0   | 7.4  | 25   | 946  | 9    | 10.23 | 65  | 0.04  | 8     | 60 | 30 | mud   |
| S35 | 23  | 7.3  | 20   | 894  | 6    | 20.5  | 90  | 0.34  | 10    | 25 | 25 | mud   |
| S36 | 40  | 8.3  | 25   | 1178 | 5    | 53.62 | 179 | 1.37  | 11    | 27 | 35 | mud   |
| S37 | 38  | 7.5  | 25   | 1245 | 8    | 18.24 | 50  | 1.4   | 13    | 29 | 25 | mud   |
| S38 | 0   | 7.6  | 25   | 910  | 8    | 8.22  | 96  | 0.4   | 10    | 62 | 15 | mud   |
| S39 | 73  | 7    | 19.5 | 570  | 7.3  | 10    | 45  | 0.042 | 5     | 31 | 45 | mud   |
| S40 | 15  | 6.75 | 26   | 1540 | 5.55 | 30.3  | 125 | 2.21  | 13.48 | 33 | 30 | mud   |
| S41 | 0   | 7.6  | 25   | 975  | 6    | 32.1  | 261 | 2.82  | 11.21 | 64 | 40 | mud   |
| S42 | 8   | 7    | 24   | 832  | 9    | 5.4   | 34  | 0.04  | 8     | 5  | 40 | mud   |
| S43 | 0   | 7.6  | 24   | 912  | 10   | 2     | 37  | 0.027 | 6     | 66 | 20 | sand  |
| S44 | 10  | 7    | 23   | 1230 | 5    | 14.77 | 90  | 3.04  | 15    | 35 | 35 | sand  |
| S45 | 0   | 6.5  | 24   | 1370 | 2.15 | 40    | 89  | 2.4   | 32    | 37 | 15 | sand  |
| S46 | 43  | 7.2  | 18   | 370  | 9.13 | 0.08  | 50  | 0.02  | 1.05  | 39 | 40 | sand  |
| S47 | 0   | 8.2  | 18   | 3340 | 6.5  | 8.65  | 48  | 3.12  | 11.4  | 6  | 25 | sand  |
| S48 | 0   | 8.8  | 23   | 2240 | 7.12 | 13.2  | 68  | 0.03  | 5.02  | 41 | 30 | sand  |
| S49 | 13  | 7.6  | 25   | 1100 | 8.24 | 5.5   | 40  | 1.22  | 7.4   | 43 | 40 | sand  |
| S50 | 0   | 8.1  | 22   | 870  | 5.5  | 6     | 64  | 0.022 | 8.5   | 68 | 5  | sand  |
| S51 | 38  | 7.1  | 25   | 430  | 7.13 | 6     | 61  | 0.022 | 8.5   | 45 | 25 | mud   |
| S52 | 30  | 7.5  | 26   | 1220 | 8.25 | 5.6   | 49  | 0.04  | 7.5   | 47 | 40 | mud   |
| S53 | 0   | 7.5  | 26   | 1320 | 5.6  | 6     | 69  | 1.23  | 8.6   | 49 | 25 | sand  |
| S54 | 5   | 7.5  | 25   | 1400 | 7.14 | 6     | 41  | 0.023 | 9.5   | 17 | 40 | sand  |
| S55 | 0   | 8.0  | 28.7 | 1143 | 8.48 | 1.53  | 62  | 1.022 | 10.5  | 19 | 70 | sand  |
| S56 | 5   | 7.7  | 27.2 | 1018 | 2.9  | 0.61  | 89  | 0.05  | 12.2  | 21 | 40 | sand  |
| S57 | 23  | 7.7  | 26.2 | 1032 | 4.46 | 1.15  | 50  | 1.24  | 13.9  | 23 | 30 | mud   |
| S58 | 10  | 7.7  | 26.4 | 926  | 4.71 | 1.05  | 50  | 0.024 | 15.6  | 25 | 25 | mud   |
| S59 | 3   | 8.15 | 27.2 | 1138 | 3.42 | 7.14  | 48  | 3.63  | 17.3  | 15 | 45 | sand  |
| S60 | 33  | 8.0  | 25.1 | 1184 | 3.55 | 7.4   | 68  | 1.17  | 5.02  | 9  | 40 | sand  |
| S61 | 103 | 7.5  | 16.9 | 250  | 7    | 1.15  | 40  | 0.63  | 1.1   | 0  | 35 | sand  |
| S62 | 63  | 8.25 | 17.5 | 600  | 7.2  | 1.05  | 64  | 0.71  | 6.78  | 27 | 40 | sand  |
| S63 | 0   | 7.8  | 18.8 | 222  | 8    | 7.14  | 61  | 0.4   | 8.16  | 70 | 20 | mud   |
| S64 | 68  | 7.5  | 19.2 | 375  | 6.5  | 9.5   | 49  | 0.84  | 6.54  | 29 | 40 | mud   |
| S65 | 33  | 7.8  | 24   | 700  | 7.9  | 2.65  | 69  | 0.85  | 8.92  | 10 | 40 | mud   |
| S66 | 3   | 7.8  | 26   | 679  | 8.1  | 4.5   | 41  | 0.18  | 9.3   | 5  | 30 | slime |
| S67 | 63  | 7.7  | 19   | 280  | 8    | 4.7   | 65  | 0.35  | 6.68  | 31 | 45 | sand  |
| S68 | 0   | 8.5  | 29.4 | 1520 | 7.1  | 6     | 62  | 0.52  | 6.06  | 33 | 10 | slime |
| S69 | 0   | 8.4  | 29.1 | 1460 | 6.3  | 7.025 | 48  | 0.69  | 12    | 6  | 70 | slime |

|     |   |     |      |      |      |       |    |       |       |    |    |       |
|-----|---|-----|------|------|------|-------|----|-------|-------|----|----|-------|
| S70 | 0 | 8.1 | 29   | 690  | 8.1  | 8.05  | 70 | 0.86  | 13.82 | 35 | 70 | sand  |
| S71 | 0 | 8.0 | 25.1 | 1184 | 3.55 | 7.4   | 68 | 1.17  | 5.02  | 14 | 70 | slime |
| S72 | 0 | 7.5 | 25   | 1245 | 8    | 18.24 | 50 | 1.4   | 13    | 37 | 90 | slime |
| S73 | 0 | 7.2 | 20   | 387  | 9.6  | 1.34  | 40 | 0.012 | 4.8   | 39 | 80 | sand  |
| S74 | 0 | 7.1 | 25   | 430  | 7.13 | 6     | 61 | 0.022 | 8.5   | 41 | 75 | slime |
